# Supplementary material for: The lattice oxygen determines the methanol selectivity in CO2 hydrogenation over ZnZrOx catalysts
Source: Royal Society of Chemistry journal article supplement (doi:10.1039/d3cy01471a), 2023-12-06
Supplement: d3cy01471a1.pdf [file d3cy01471a1.pdf]

Supplementary Materials for  
The Lattice oxygen determines the methanol selectivity in CO<sub>2</sub> hydrogenation over  
ZnZrO<sub>x</sub> catalysts

This PDF file includes:

**Table. S1.** Catalytic performance of the ZnZrO<sub>x</sub> catalyst. Reaction conditions: 5.0 MPa, H<sub>2</sub>/CO<sub>2</sub> = 3:1, GHSV = 24,000 mL/(g·h), 325 °C.

**Table. S2.** Catalytic performance of the ZnZrO<sub>x</sub> catalysts in literature for CO<sub>2</sub> hydrogenation to methanol.

**Table. S3.** Arrhenius plots of CO<sub>2</sub> hydrogenation over ZZ-320 and ZZ-500.

**Table. S4.** Elemental content of ZZ-320 catalyst from EDS results.

**Table. S5.** d-spacings of catalysts calculated using the Bragg equation from XRD.

**Table. S6.** The BET results from catalysts with various grinding speeds.

**Table. S7.** Deconvolution results of O 1s XPS peaks.

**Table. S8.** Quantitative results of the H<sub>2</sub>-TPR, O<sub>2</sub>-TPD, CO<sub>2</sub>-TPD.

**Fig. S1.** The CO<sub>2</sub> conversion and the CH<sub>3</sub>OH Selectivity of catalysts prepared with various grinding speeds. Reaction conditions: 325 °C, 5.0 MPa, H<sub>2</sub>/CO<sub>2</sub> = 3:1, GHSV = 24,000 mL/(g·h).

**Fig. S2. Catalytic performance of the catalyst.** (a) CO<sub>2</sub> conversion (b) CH<sub>3</sub>OH Selectivity and (c) CH<sub>3</sub>OH Yield of catalysts prepared at various Zr/Zn metal ratios. Reaction conditions: 5.0 MPa, H<sub>2</sub>/CO<sub>2</sub> = 3:1, GHSV = 24,000 mL/(g·h).

**Fig. S3.** The EDS element energy spectrum of ZZ-320 catalyst.

**Fig. S4.** XRD patterns of catalysts with different Zr/Zn ratios.

**Fig. S5.** Nitrogen adsorption-desorption isotherms of catalysts prepared with various grinding speeds.

**Fig. S6.** Aperture distribution diagram catalysts prepared with various grinding speeds.

**Fig. S7.** O 1s XPS of catalysts with different Zr/Zn ratios.

**Fig. S8.** Zn 2p and Zr 3d XPS of catalysts with different Zr/Zn ratios.

**Fig. S9.** Zn LM XPS of catalysts with different Zr/Zn ratios.

**Fig. S10.** Zr/Zn metal ratio in the surface region of ZnO-ZrO<sub>2</sub> measured by XPS.

**Fig. S11.** H<sub>2</sub>-TPR profiles of ZnO/ZrO<sub>2</sub> and ZnZrO<sub>x</sub> catalysts.

**Fig. S12.** Temperature-dependent in-situ DRIFTS spectra in H<sub>2</sub> over ZZ-320 and ZZ-500. (Conditions: 100–400 °C, 0.1 MPa, H<sub>2</sub>, 40 mL/min, after reaction gas pretreatment).

**Table. S1.** Catalytic performance of the ZnZrO<sub>x</sub> catalyst. Reaction conditions: 5.0 MPa, H<sub>2</sub>/CO<sub>2</sub> = 3:1, GHSV = 24,000 mL/(g·h), 325 °C.

| Catalyst             | CO <sub>2</sub> | Production Selectivity |                     |        | Yield                      |                          |
|----------------------|-----------------|------------------------|---------------------|--------|----------------------------|--------------------------|
|                      | Conversion (%)  | CH <sub>3</sub> OH (%) | CH <sub>4</sub> (%) | CO (%) | (mg/(g <sub>cat</sub> ·h)) | (mg/(m <sup>2</sup> ·h)) |
| ZZ-200               | 3.59            | 45.18                  | 0.35                | 54.21  | 137.9                      | 4.4                      |
| ZZ-300               | 5.06            | 52.90                  | 0.66                | 46.21  | 170.8                      | 4.4                      |
| ZZ-320               | 5.18            | 72.17                  | 0.2                 | 27.48  | 273.4                      | 5.9                      |
| ZZ-350               | 4.19            | 55.17                  | 1.75                | 42.88  | 170.0                      | 3.9                      |
| ZZ-400               | 4.08            | 41.42                  | 4.83                | 53.53  | 126.2                      | 4.5                      |
| ZZ-500               | 3.98            | 37.13                  | 2.45                | 59.91  | 86.52                      | 3.2                      |
| Zr/Zn=19             | 4.95            | 32.59                  | 7.08                | 60.23  | 114.0                      | 3.9                      |
| Zr/Zn=3              | 3.36            | 54.9                   | 1.44                | 43.23  | 135.2                      | 3.7                      |
| ZnO-ZrO <sub>2</sub> | 1.14            | 35.17                  | 3.21                | 60.46  | 30.35                      | -                        |

**Table. S2.** Catalytic performance of the ZnZrO<sub>x</sub> catalysts in literature for CO<sub>2</sub> hydrogenation to methanol.

| Catalyst                                                                   | Temperature (°C) | Pressure (MPa) | GHSV (mL/g <sup>-1</sup> ·h <sup>-1</sup> ) | H <sub>2</sub> /CO <sub>2</sub> | CO <sub>2</sub> Conversion (%) | CH <sub>3</sub> OH Selectivity (%) |
|----------------------------------------------------------------------------|------------------|----------------|---------------------------------------------|---------------------------------|--------------------------------|------------------------------------|
| ZZ-320                                                                     | 325              | 5              | 24000                                       | 3                               | 5.2                            | 72.2                               |
| ZnO-ZrO <sub>2</sub> (Zn/Zr = 1:1) <sup>1</sup>                            | 320              | 3              | 24000                                       | 3                               | 5.7                            | 70.0                               |
| Co <sub>3</sub> O <sub>4</sub> -ZrO <sub>2</sub> (Co/Zr =3:1) <sup>1</sup> | 320              | 3              | 24000                                       | 3                               | 1.9                            | 1.0                                |
| CuO-ZrO <sub>2</sub> (Cu/Zr = 3:1) <sup>1</sup>                            | 320              | 3              | 24000                                       | 3                               | 14.0                           | 20.3                               |
| ZnInO <sub>x</sub> <sup>2</sup>                                            | 300              | 2              | 24000                                       | 3                               | 4.7                            | 47.0                               |
| 11.5%GaZrO <sub>x</sub> <sup>2</sup>                                       | 300              | 2              | 24000                                       | 3                               | 2.4                            | 75.0                               |
| 15ZnZr-600 <sup>3</sup>                                                    | 340              | 3              | 24000                                       | 3                               | 7.4                            | 55.8                               |
| GaZnZrO <sub>x</sub> <sup>4</sup>                                          | 320              | 5              | 24000                                       | 3                               | 8.8                            | 85.0                               |
| ZrZn-15 <sup>5</sup>                                                       | 350              | 3              | 12000                                       | 3                               | 7.0                            | 50.0                               |
| 20% ZnO-ZrO <sub>2</sub> (CP) <sup>6</sup>                                 | 320              | 5.5            | 24000                                       | 3                               | 7.0                            | 87.0                               |
| 0.8%PdZnZrO <sub>x</sub> <sup>7</sup>                                      | 280              | 5              | 24000                                       | 4                               | 7.8                            | 56.0                               |
| ZnZrO <sub>x</sub> -RA <sup>8</sup>                                        | 320              | 5              | 24000                                       |                                 | 4.4                            | 94.0                               |
| 13ZnZrO <sub>x</sub> FSP <sup>9</sup>                                      | 320              | 5              | 24000                                       | 4                               | 7.0                            | 80.0                               |
| 5.0% Zn-CdZrO <sub>x</sub> <sup>10</sup>                                   | 320              | 5              | 24000                                       | 4                               | 8.5                            | 80.8                               |
| 13%ZnO-ZrO <sub>2</sub> <sup>11</sup>                                      | 320              | 5              | 24000                                       | 4                               | 10.0                           | 86.0                               |

**Table. S3.** Arrhenius plots of CO<sub>2</sub> hydrogenation over ZZ-320 and ZZ-500.

| Catalyst | Ea (KJ/mol) | Correlation factor |
|----------|-------------|--------------------|
| Z-200    | 24.45       | 0.97               |
| ZZ-320   | 22.86       | 0.97               |
| ZZ-500   | 35.64       | 0.99               |

**Table. S4.** Elemental content of ZZ-320 catalyst from EDS results

| Element | Atomic (%) | Error (%) |
|---------|------------|-----------|
| O       | 47.07      | 0.30      |
| Zn      | 9.41       | 0.26      |
| Zr      | 43.52      | 0.08      |

**Table. S5.** d-spacings of catalysts calculated using the Bragg equation from XRD.

| Catalyst | The average diameter of grains by XRD (nm) |
|----------|--------------------------------------------|
| ZZ-200   | 6.5                                        |
| ZZ-300   | 7.2                                        |
| ZZ-320   | 8.3                                        |
| ZZ-350   | 7.4                                        |
| ZZ-400   | 7.6                                        |
| ZZ-500   | 6.3                                        |

**Table. S6.** The BET results from catalysts with various grinding speeds.

| Catalyst | BET Surface Area(m <sup>2</sup> /g) | Pore Volume (cm <sup>3</sup> /g) | Pore Size (nm) |
|----------|-------------------------------------|----------------------------------|----------------|
| ZZ-200   | 31.2                                | 0.054                            | 5.8            |
| ZZ-300   | 38.5                                | 0.0632                           | 5.6            |
| ZZ-320   | 46.5                                | 0.0638                           | 3.9            |
| ZZ-350   | 43.3                                | 0.0625                           | 5.4            |
| ZZ-400   | 28.1                                | 0.0460                           | 6.6            |
| ZZ-500   | 27.1                                | 0.0265                           | 8.2            |

**Table. S7.** Deconvolution results of O 1s XPS peaks.

| Catalyst | O species (%)  |                 |                  |
|----------|----------------|-----------------|------------------|
|          | O <sub>I</sub> | O <sub>II</sub> | O <sub>III</sub> |
| Zr/Zn=19 | 55.12          | 34.02           | 10.86            |
| Zr/Zn=6  | 71.10          | 22.10           | 6.80             |
| Zr/Zn=3  | 53.83          | 30.88           | 15.29            |

**Table. S8.** Quantitative results of the H<sub>2</sub>-TPR, O<sub>2</sub>-TPD, CO<sub>2</sub>-TPD.

| Catalyst | H <sub>2</sub> uptake in H <sub>2</sub> -TPR (mmol/g) |        | CO <sub>2</sub> uptake in CO <sub>2</sub> -TPD (mmol/g) |        | O <sub>2</sub> uptake in O <sub>2</sub> -TPD (mmol/g) |        |        |
|----------|-------------------------------------------------------|--------|---------------------------------------------------------|--------|-------------------------------------------------------|--------|--------|
|          | 332 °C                                                | 617 °C | 100 °C                                                  | 408 °C | 82 °C                                                 | 461 °C | 658 °C |
| ZZ-320   | 0.0041                                                | 0.54   | 0.66                                                    | 0.35   | 44.42                                                 | 72.60  | 51.65  |
| ZZ-500   | 0.0017                                                | 0.49   | 0.46                                                    | 0.12   | 37.67                                                 | 0.079  | 0.087  |

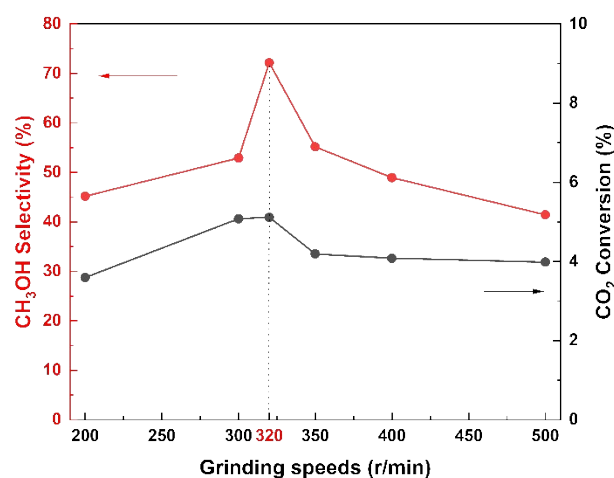**Fig. S1.** The CO<sub>2</sub> conversion and the CH<sub>3</sub>OH Selectivity of catalysts prepared with various grinding speeds. Reaction conditions: 325 °C, 5.0 MPa, H<sub>2</sub>/CO<sub>2</sub> = 3:1, GHSV = 24,000 mL/(g·h).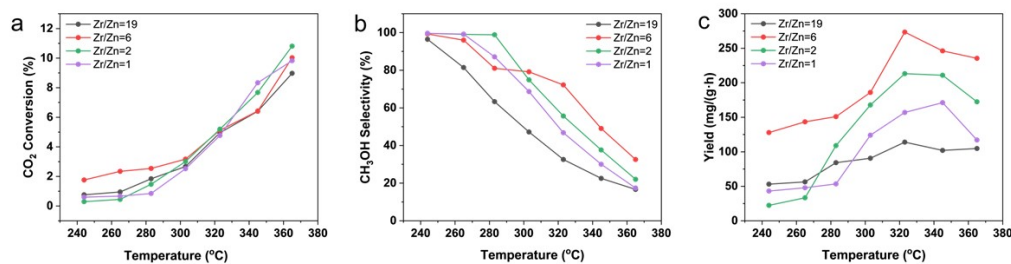**Fig. S2.** Catalytic performance of the catalyst. (a) CO<sub>2</sub> conversion (b) CH<sub>3</sub>OH selectivity and (c) CH<sub>3</sub>OH yield of catalysts prepared at various Zr/Zn metal ratios. Reaction conditions: 5.0 MPa, H<sub>2</sub>/CO<sub>2</sub> = 3:1, GHSV = 24,000 mL/(g·h).

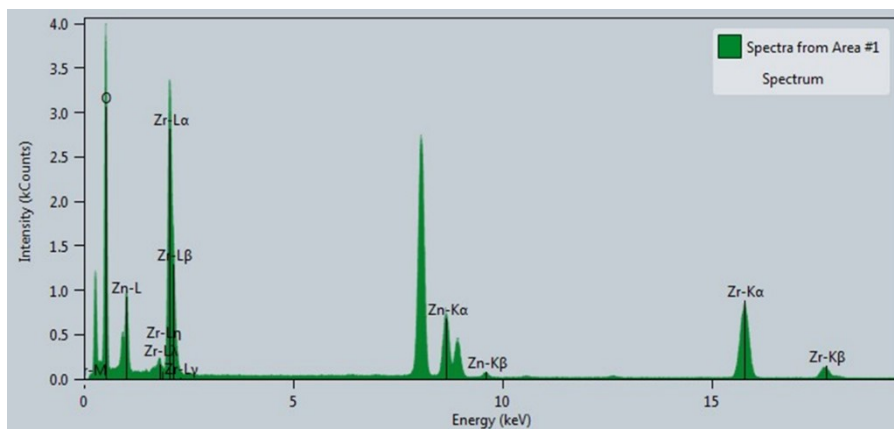

**Fig. S3.** The EDS element energy spectrum of ZZ-320 catalyst.

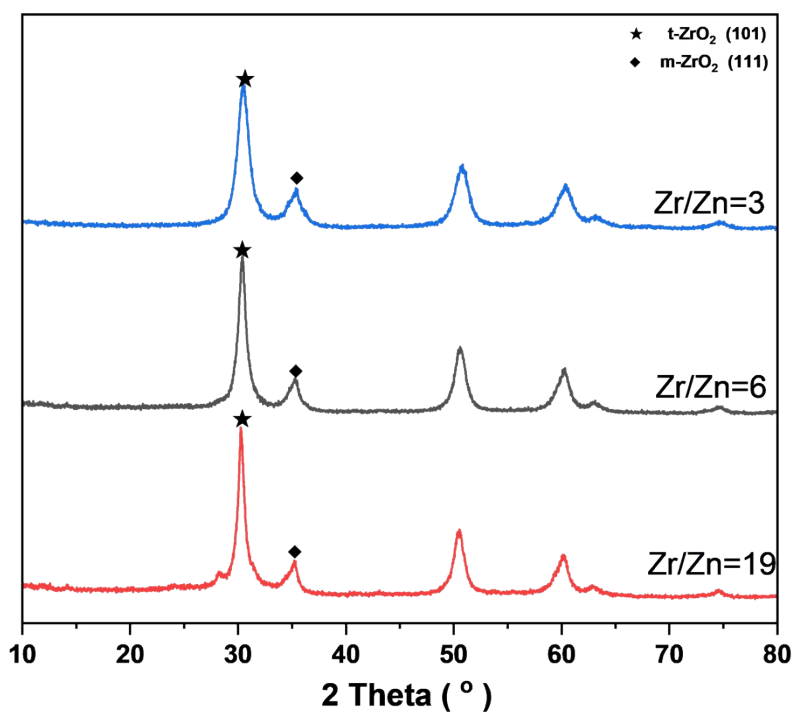

**Fig. S4.** XRD patterns of catalysts with different Zr/Zn ratios.

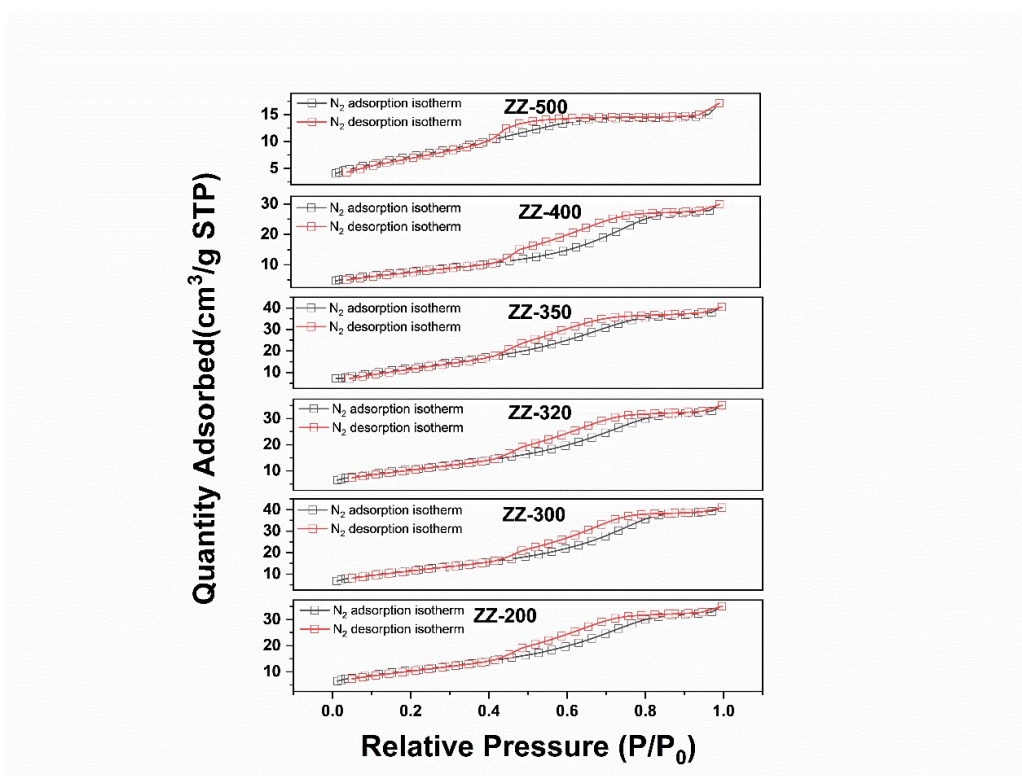

**Fig. S5.** Nitrogen adsorption-desorption isotherms of catalysts prepared with various grinding speeds.

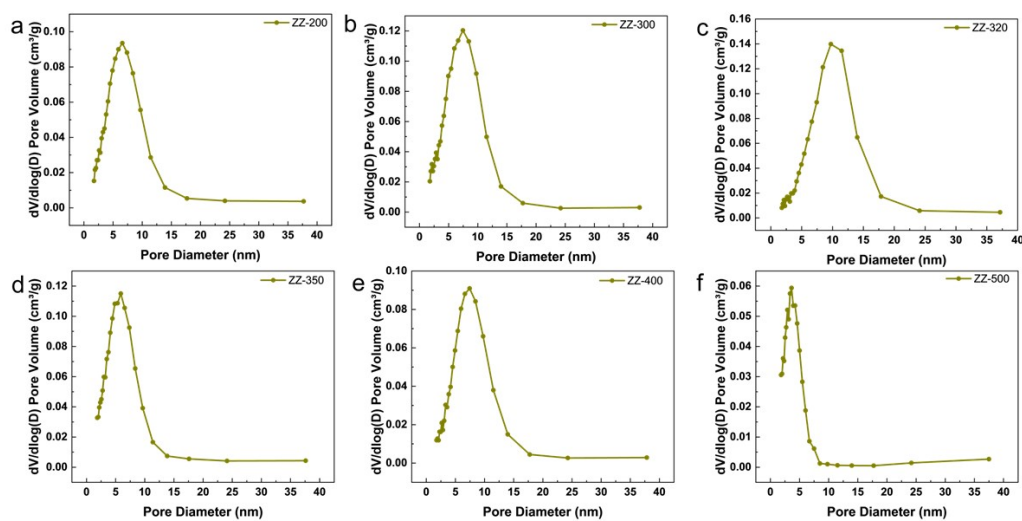

**Fig. 6.** Aperture distribution diagram catalysts prepared with various grinding speeds. (a)ZZ-200, (b)ZZ-300, (c)ZZ-320, (d)ZZ-350, (e)ZZ-400, (f)ZZ-500.

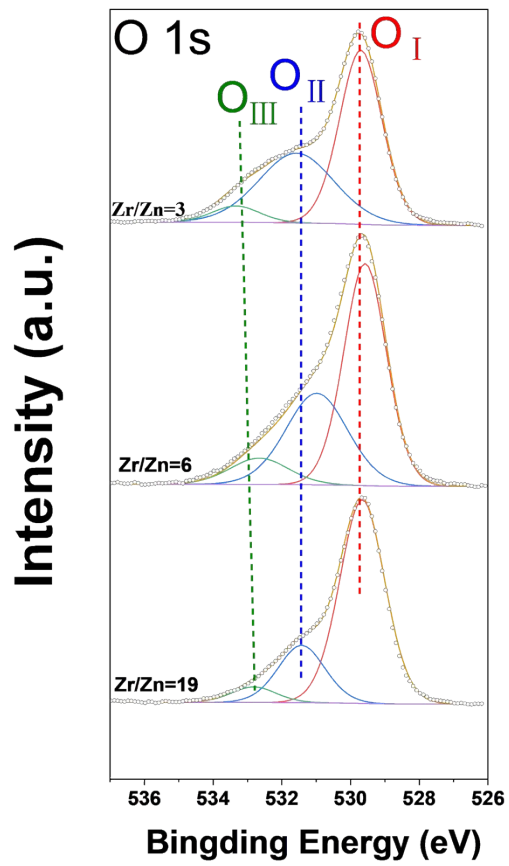

Fig. S7. O 1s XPS of catalysts with different Zr/Zn ratios.

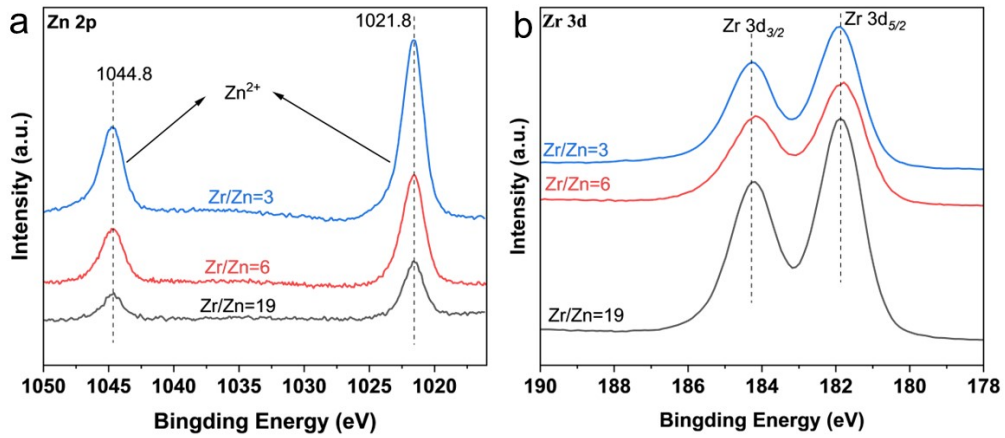

Fig. S8. Zn 2p (a) and Zr 3d (b) XPS of catalysts with different Zr/Zn ratios.

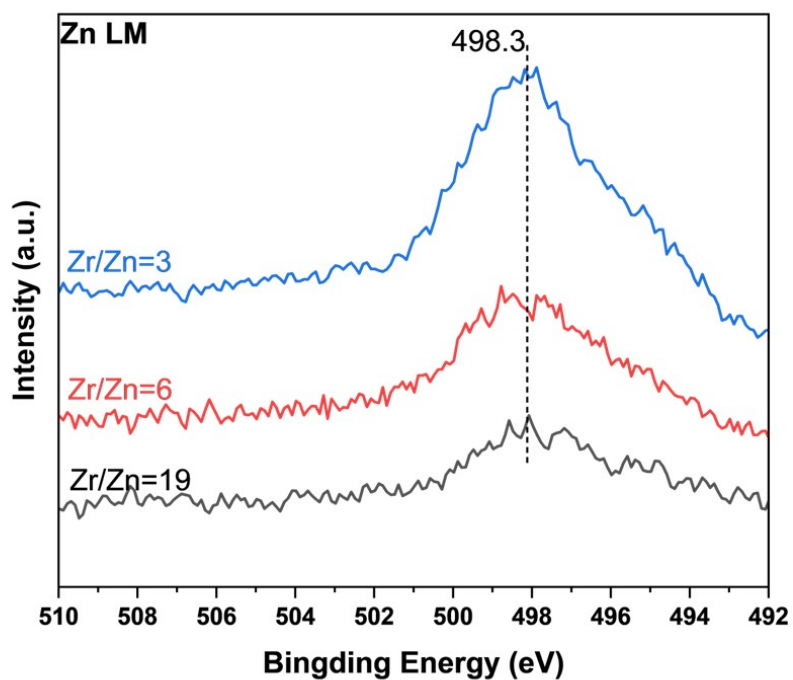

Fig. S9. Zn LM XPS of catalysts with different Zr/Zn ratios.

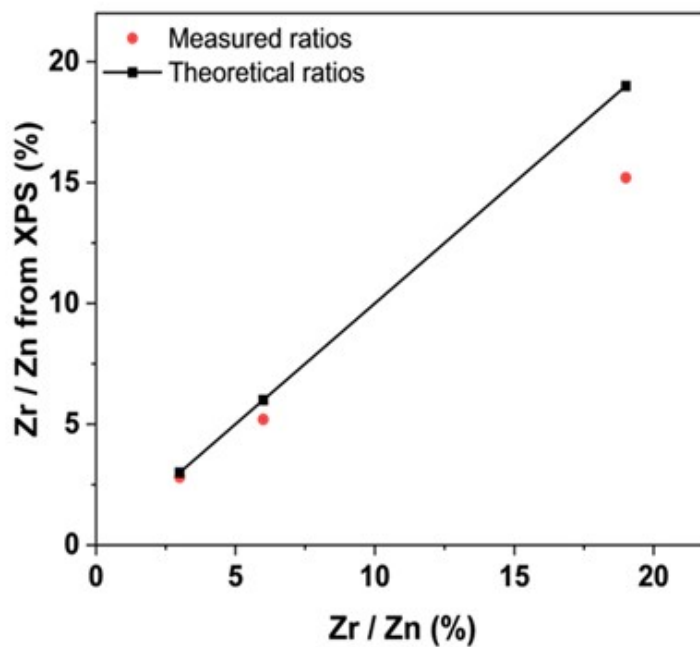

Fig. S10. Zr/Zn metal ratio in the surface region of ZnO-ZrO<sub>2</sub> measured by XPS.



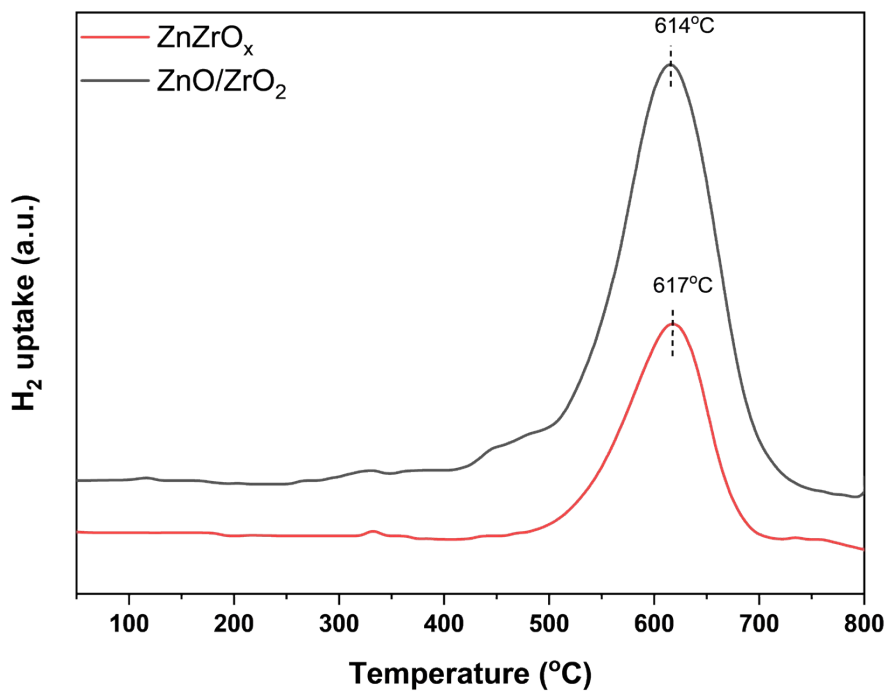

Fig. S11. H<sub>2</sub>-TPR profiles of ZnO/ZrO<sub>2</sub> and ZnZrO<sub>x</sub> catalysts.

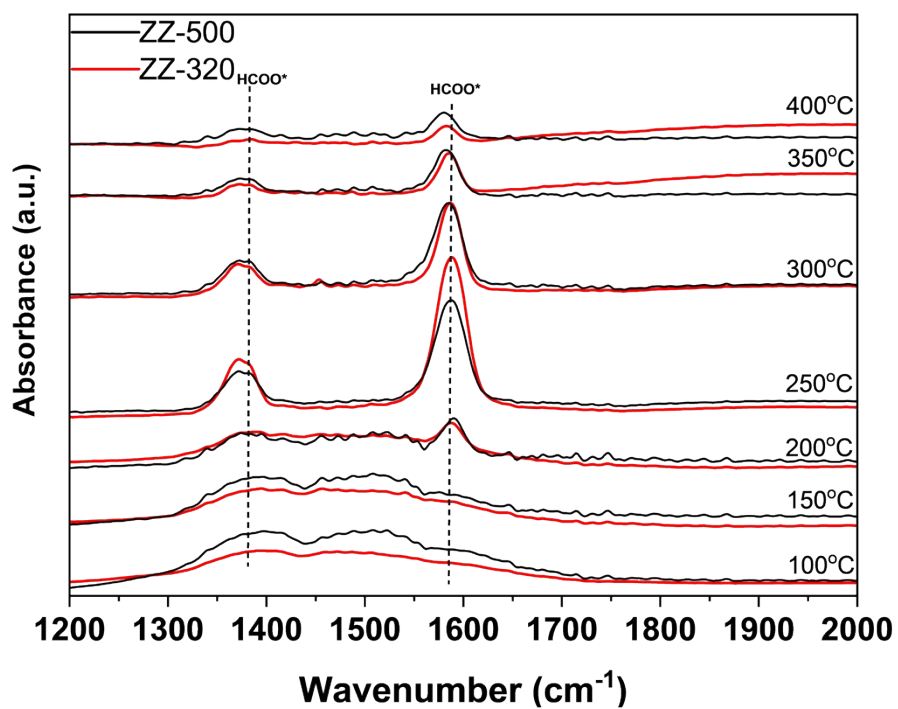

Fig. S12. Temperature-dependent in-situ DRIFTS spectra in H<sub>2</sub> over ZZ-320 and ZZ-500. (Conditions: 100–400 °C, 0.1 MPa, H<sub>2</sub>, 40 mL/min, after reaction gas pretreatment).

## References :

- (1) Li, W.; Wang, K.; Huang, J.; Liu, X.; Fu, D.; Huang, J.; Li, Q.; Zhan, G.  $M_xO_y$ -ZrO<sub>2</sub> (M = Zn, Co, Cu) Solid Solutions Derived from Schiff Base-Bridged UiO-66 Composites as High-Performance Catalysts for CO<sub>2</sub> Hydrogenation. *ACS Appl. Mater. Interfaces* **2019**, *11* (36), 33263-33272. DOI: 10.1021/acsami.9b11547.
- (2) Wang, J.; Tang, C.; Li, G.; Han, Z.; Li, Z.; Liu, H.; Cheng, F.; Li, C. High-Performance MaZrO<sub>x</sub> (Ma = Cd, Ga) Solid-Solution Catalysts for CO<sub>2</sub> Hydrogenation to Methanol. *ACS Catal.* **2019**, *9* (11), 10253-10259. DOI: 10.1021/acscatal.9b03449.
- (3) Temvuttirojn, C.; Poo-arporn, Y.; Chanlek, N.; Cheng, C. K.; Chong, C. C.; Limtrakul, J.; Witoon, T. Role of Calcination Temperatures of ZrO<sub>2</sub> Support on Methanol Synthesis from CO<sub>2</sub> Hydrogenation at High Reaction Temperatures over ZnO<sub>x</sub>/ZrO<sub>2</sub> Catalysts. *Ind. Eng. Chem. Res* **2020**, *59* (13), 5525-5535. DOI: 10.1021/acs.iecr.9b05691.
- (4) Sha, F.; Tang, C.; Tang, S.; Wang, Q.; Han, Z.; Wang, J.; Li, C. The promoting role of Ga in ZnZrO<sub>x</sub> solid solution catalyst for CO<sub>2</sub> hydrogenation to methanol. *J Catal* **2021**, *404*, 383-392. DOI: 10.1016/j.jcat.2021.09.030.
- (5) Ticali, P.; Salusso, D.; Ahmad, R.; Ahoba-Sam, C.; Ramirez, A.; Shterk, G.; Lomachenko, K. A.; Borfecchia, E.; Morandi, S.; Cavallo, L.; et al. CO<sub>2</sub> hydrogenation to methanol and hydrocarbons over bifunctional Zn-doped ZrO<sub>2</sub>/zeolite catalysts. *Catal. Sci. Technol* **2021**, *11* (4), 1249-1268. DOI: 10.1039/d0cy01550d.
- (6) Han, Z.; Tang, C.; Sha, F.; Tang, S.; Wang, J.; Li, C. CO<sub>2</sub> hydrogenation to methanol on ZnO-ZrO<sub>2</sub> solid solution catalysts with ordered mesoporous structure. *J Catal* **2021**, *396*, 242-250. DOI: 10.1016/j.jcat.2021.02.024.
- (7) Lee, K.; Anjum, U.; Araújo, T. P.; Mondelli, C.; He, Q.; Furukawa, S.; Pérez-Ramírez, J.; Kozlov, S. M.; Yan, N. Atomic Pd-promoted ZnZrO solid solution catalyst for CO<sub>2</sub> hydrogenation to methanol. *Appl. Catal. B* **2022**, *304*. DOI: 10.1016/j.apcatb.2021.120994.
- (8) Sha, F.; Tang, S.; Tang, C.; Feng, Z.; Wang, J.; Li, C. The role of surface hydroxyls on ZnZrO solid solution catalyst in CO<sub>2</sub> hydrogenation to methanol. *Chinese J. Catal.* **2023**, *45*, 162-173. DOI: 10.1016/s1872-2067(22)64176-7.
- (9) Pinheiro Araújo, T.; Morales-Vidal, J.; Zou, T.; Agrachev, M.; Verstraeten, S.; Willi, P. O.; Grass, R. N.; Jeschke, G.; Mitchell, S.; López, N.; et al. Design of Flame-Made ZnZrO<sub>x</sub> Catalysts for Sustainable Methanol Synthesis from CO<sub>2</sub>. *Adv. Energy Mater.* **2023**, *13* (14). DOI: 10.1002/aenm.202204122.
- (10) Ma, X.; Li, X.; Yang, X.; Tian, X.; Zhan, H.; Wang, W.; Lv, P.; Ma, B. Zn-CdZrO<sub>x</sub> solid solution catalysts for hydrogenation of CO<sub>2</sub> to methanol. *Fuel* **2023**, *346*. DOI: 10.1016/j.fuel.2023.128376.
- (11) Jijie Wang, Z. L., Chizhou Tang, Zhaochi Feng, Hongyu An, Hailong Liu, Taifeng Liu, Can Li. A highly selective and stable ZnO-ZrO<sub>2</sub> solid solution catalyst for CO<sub>2</sub> hydrogenation to methanol. *Sci. Adv.* **2017**, *3*. DOI: 10.1126/sciadv.1701290.
